# Supplementary material for: MicroRNAs Profiling Identifies miR-125a and Its Target Gene Wnt2 in Skins of Different Haired Rabbits
Source: Front Genet. 2018 Dec 10;9:628. doi: 10.3389/fgene.2018.00628 (PMC6295454; doi:10.3389/fgene.2018.00628)
Supplement: TABLE S2 — Differentially expressed miRNAs from the L and S libraries. The expression of the miRNA in two libraries was normalized to get the expression of TPM. The fold-change and p-value were calculated from the normalized expression. The differentially expressed miRNAs were selected based on P-values < 0.05 and | log2 (fold change)| > 1. [file Table_2.XLS]

## Sheet: G1_VS_G2_differential
Table S2 The differentially expressed miRNAs
gene_id	description	G1_Tpm	G2_Tpm	Fold_change-G1/G2	p-value	FDR	UP/DOWN regulate	Sequence
mir-21 (Bos taurus)	Bos taurus	2072.28	7765.03	0.266873	0	0	DOWN	TAGCTTATCAGACTGATGTTGACT
mir-30d (Bos taurus)	Bos taurus	4376.93	8979.58	0.487432	0	0	DOWN	TGTAAACATCCCCGACTGGAAGCT
mir-125a (Bos taurus)	Bos taurus	1961.83	927.514	2.11515	3.32219e-84	1.11822e-82	UP	TCCCTGAGACCCTTTAACCTGTG
mir-181a-2 (Bos taurus)	Bos taurus	236.798	639.936	0.370033	1.0882e-43	2.44185e-42	DOWN	AACATTCAACGCTGTCGGTGAGTT
mir-181b-2 (Bos taurus)	Bos taurus	113.774	354.109	0.321295	4.91626e-30	8.36894e-29	DOWN	AACATTCATTGCTGTCGGTGGGTT
mir-30e (Bos taurus)	Bos taurus	3221.21	8327.6	0.386811	0	0	DOWN	CTGACCTATGAATTGACAGCCAG
mir-192 (Bos taurus)	Bos taurus	26.6973	62.5842	0.426582	0.000132118	0.000850723	DOWN	TGTAAACATCCTTGACTGGAAGCT
mir-200a (Bos taurus)	Bos taurus	17.9908	57.3155	0.31389	3.05378e-06	2.43153e-05	DOWN	TAACACTGTCTGGTAACGATGTT
mir-23a (Bos taurus)	Bos taurus	232.698	113.14	2.05673	1.58169e-10	1.55132e-09	UP	ATCACATTGCCAGGGATTTCCA
mir-455 (Bos taurus)	Bos taurus	111.454	43.7367	2.5483	5.03817e-08	4.41511e-07	UP	TATGTGCCTTTGGACTACATC,GCAGTCCATGGGCATATACACT
mir-193b (Bos taurus)	Bos taurus	475.55	191.178	2.48748	9.44178e-29	1.5537e-27	UP	AACTGGCCCACAAAGTCCCGCTTT
mir-181a-1 (Bos taurus)	Bos taurus	236.904	639.652	0.370364	1.0882e-43	2.44185e-42	DOWN	AACATTCAACGCTGTCGGTGAGTT
mir-181b-1 (Bos taurus)	Bos taurus	114.27	356.315	0.320699	4.40259e-30	7.58166e-29	DOWN	AACATTCATTGCTGTCGGTGGGTT
mir-2478 (Bos taurus)	Bos taurus	392.455	1274.72	0.307876	8.64012e-109	3.45838e-107	DOWN	GTATCCCACTTCTGACACCA
mir-424 (Bos taurus)	Bos taurus	31.573	83.0611	0.380117	1.01209e-06	8.23574e-06	DOWN	CAGCAGCAATTCATGTTTTGA
mir-2898 (Bos taurus)	Bos taurus	149.351	909.168	0.164273	1.6522e-133	7.19678e-132	DOWN	TCCCCGGCATCTCCACCA
mir-1260b (Bos taurus)	Bos taurus	9.809	115.647	0.0848187	2.67582e-24	3.88519e-23	DOWN	ATCCCACCACTGCCACCA
mir-6529a (Bos taurus)	Bos taurus	164.058	571.733	0.286949	1.363e-53	3.88194e-52	DOWN	GAGAGATCAGAGGCGCAGAGT
mir-101 (Capra hircus)	Capra hircus	1155.45	2318.56	0.498347	2.04721e-88	7.77413e-87	DOWN	TACAGTACTGTGATAACTGA
mir-106b (Capra hircus)	Capra hircus	39.9405	84.501	0.472663	5.10054e-05	0.000354643	DOWN	CCGCACTGTGGGTACTTGCT
mir-125a (Capra hircus)	Capra hircus	4096.97	1709.24	2.39695	2.92174e-222	2.27742e-220	UP	TCCCTGAGACCCTTTAACCTGT
mir-190a (Capra hircus)	Capra hircus	5.89682	48.9312	0.120513	1.01773e-09	9.42032e-09	DOWN	TGATATGTTTGATATATTAGGTT
mir-21 (Capra hircus)	Capra hircus	2663.17	7660.99	0.347628	0	0	DOWN	CAACAGCAGTCGATGGGCTGT
mir-30d (Capra hircus)	Capra hircus	117.156	343.709	0.340859	7.2652e-27	1.13261e-25	DOWN	TTTCAGTCAGATGTTTGCTGC
mir-374a (Capra hircus)	Capra hircus	19.8101	53.4795	0.370425	6.49291e-05	0.000439087	DOWN	TTATAATACAACCTGATAAGT
mir-106b (Cricetulus griseus)	Cricetulus griseus	38.8371	123.878	0.31351	1.05163e-11	1.08157e-10	DOWN	TAAAGTGCTGACAGTGCAGATA
mir-107 (Cricetulus griseus)	Cricetulus griseus	119.535	332.456	0.359552	2.07723e-24	3.04591e-23	DOWN	AGCAGCATTGTACAGGGCTATC
mir-10b (Cricetulus griseus)	Cricetulus griseus	97327.7	38332.5	2.53904	0	0	UP	TACCCTGTAGAACCGAATTTGT
mir-125b (Cricetulus griseus)	Cricetulus griseus	61.8561	139.871	0.442237	2.96202e-08	2.6268e-07	DOWN	TCACAAGTCAGGCTCTTGGGAC
mir-141 (Cricetulus griseus)	Cricetulus griseus	135.697	396.69	0.342073	8.19239e-31	1.4274e-29	DOWN	TAACACTGTCTGGTAAAGATGGC
mir-146a (Cricetulus griseus)	Cricetulus griseus	35.3998	3.57479	9.90263	1.85656e-07	1.56225e-06	UP	TGAGAACTGAATTCCATAGGCTG
mir-149 (Cricetulus griseus)	Cricetulus griseus	23.3984	87.451	0.26756	5.67797e-10	5.3222e-09	DOWN	TCTGGCTCCGTGTCTTCACTCC
mir-183 (Cricetulus griseus)	Cricetulus griseus	156.524	362.577	0.431699	5.72345e-20	7.50127e-19	DOWN	ATGGCACTGGTAGAATTCACTG
mir-218a (Cricetulus griseus)	Cricetulus griseus	43.1793	91.3505	0.472678	3.43723e-05	0.00024592	DOWN	TTGTGCTTGATCTAACCATGTG
mir-872 (Cricetulus griseus)	Cricetulus griseus	23.9416	48.5458	0.493175	0.00337165	0.0184259	DOWN	TGAACTATTGGAGTAGCCTCC
mir-92a (Cricetulus griseus)	Cricetulus griseus	8488.93	22405	0.378886	0	0	DOWN	TATTGCACTTGTCCCGGCCTGT
mir-182 (Equus caballus)	Equus caballus	160.068	993.243	0.161157	3.07231e-147	1.46777e-145	DOWN	TTTGGCAATGGTAGAACTCACACTG
mir-214 (Equus caballus)	Equus caballus	83.9176	36.1824	2.31929	2.31514e-05	0.000171436	UP	ACAGCAGGCACAGACAGGCAGTT
mir-200c (Equus caballus)	Equus caballus	52.0261	107.251	0.485088	1.28641e-05	9.6221e-05	DOWN	TAATACTGCCGGGTAATGATGGAT
mir-92a (Equus caballus)	Equus caballus	22.6176	73.2154	0.308918	1.31634e-07	1.1204e-06	DOWN	TATTGCACTTGTCCCGGCCTGTC
mir-17 (Homo sapiens)	Homo sapiens	7.57126	37.2623	0.203188	5.53831e-06	4.31697e-05	DOWN	ACTGCAGTGAAGGCACTTGTAG
mir-31 (Homo sapiens)	Homo sapiens	59.1211	672.509	0.0879113	1.94662e-132	8.237e-131	DOWN	ACTGCAGTGAAGGCACTTGTAG
mir-139 (Homo sapiens)	Homo sapiens	45.221	21.1817	2.13491	0.00490266	0.0260245	UP	TCTACAGTGCACGTGTCTCCAGT
mir-182 (Homo sapiens)	Homo sapiens	1636.76	6111.77	0.267805	0	0	DOWN	TTTGGCAATGGTAGAACTCACACT
mir-130a (Homo sapiens)	Homo sapiens	178.259	584.898	0.304769	2.73479e-51	7.36406e-50	DOWN	CAGTGCAATGTCAAAAGGGCATT
mir-141 (Homo sapiens)	Homo sapiens	16.7012	61.4279	0.271883	2.26495e-07	1.89514e-06	DOWN	TAACACTGTCTGGTAAAGATGGCT
mir-146a (Homo sapiens)	Homo sapiens	69.9216	20.0405	3.48902	2.50759e-07	2.08637e-06	UP	TTGAGAACTGAATTCCATGGGT
mir-374a (Homo sapiens)	Homo sapiens	30.558	77.5704	0.393939	5.3418e-06	4.18582e-05	DOWN	TTATAATACAACCTGATAAGTG
mir-424 (Homo sapiens)	Homo sapiens	20.4249	55.6416	0.367079	5.56931e-05	0.000380099	DOWN	CAGCAGCAATTCATGTTTTGAA
mir-455 (Homo sapiens)	Homo sapiens	37.4791	18.1799	2.06156	0.0163466	0.0780945	UP	GCAGTCCATGGGCATATACAC
mir-1296 (Homo sapiens)	Homo sapiens	79.2396	194.212	0.408007	2.10323e-12	2.24092e-11	DOWN	TTAGGGCCCTGGCTCCATCTCC
mir-450b (Homo sapiens)	Homo sapiens	78.127	218.327	0.357844	1.51064e-16	1.76162e-15	DOWN	TTTTGCAATATGTTCCTGAATA
mir-301b (Homo sapiens)	Homo sapiens	4.72477	55.2717	0.0854827	3.06349e-12	3.21775e-11	DOWN	CAGTGCAATGATATTGTCAAAGC
mir-1307 (Homo sapiens)	Homo sapiens	19.1503	121.987	0.156986	2.77633e-19	3.51431e-18	DOWN	TCGACCGGACCTCGACCGGCT
mir-3120 (Homo sapiens)	Homo sapiens	32.0256	14.0096	2.28598	0.0132822	0.0638666	UP	TACAGCAGGCACAGACAGGC
mir-1260b (Homo sapiens)	Homo sapiens	23.2841	62.5921	0.371997	2.37171e-05	0.000174751	DOWN	ATCCCACCACTGCCACCAT
mir-4286 (Homo sapiens)	Homo sapiens	16.2795	101.768	0.159967	3.40114e-16	3.90472e-15	DOWN	ACCCCACTCCTGGTACC
mir-3607 (Homo sapiens)	Homo sapiens	37.6341	77.2946	0.486892	0.000189222	0.0011925	DOWN	ACTGTAAACGCTTTCTGATG
mir-3613 (Homo sapiens)	Homo sapiens	35.286	103.915	0.339566	5.07383e-09	4.58192e-08	DOWN	TGTTGTACTTTTTTTTTTGTTC
mir-4454 (Homo sapiens)	Homo sapiens	49.415	120.004	0.411779	3.94732e-08	3.47975e-07	DOWN	GGATCCGAGTCACGGCACCA
mir-15b (Mus musculus)	Mus musculus	236.518	485.034	0.487631	8.77238e-21	1.20295e-19	DOWN	TAGCAGCACATCATGGTTTACA
mir-144 (Mus musculus)	Mus musculus	82.5136	165.608	0.498247	1.16991e-07	1.00153e-06	DOWN	TAGCAGCACATCATGGTTTACA,GGATATCATCATATACTGTAAGT
mir-145a (Mus musculus)	Mus musculus	1932.2	716.274	2.69757	5.773e-128	2.37495e-126	UP	GTCCAGTTTTCCCAGGAATCCCT
mir-146a (Mus musculus)	Mus musculus	367.099	87.5661	4.19225	9.05467e-42	1.88873e-40	UP	TGAGAACTGAATTCCATGGGTT
mir-149 (Mus musculus)	Mus musculus	46.7534	288.037	0.162317	7.04019e-44	1.60408e-42	DOWN	TGAGAACTGAATTCCATGGGTT
mir-10b (Mus musculus)	Mus musculus	24190.7	8687.52	2.78453	0	0	UP	TACCCTGTAGAACCGAATTTGTG
mir-193a (Mus musculus)	Mus musculus	146.481	296.748	0.493623	6.95417e-13	7.51761e-12	DOWN	AACTGGCCTACAAAGTCCCAGT
mir-204 (Mus musculus)	Mus musculus	176.636	48.1695	3.66697	3.39205e-18	4.18636e-17	UP	TTCCCTTTGTCATCCTATGCCT
mir-301a (Mus musculus)	Mus musculus	222.035	690.692	0.321467	1.46183e-56	4.32993e-55	DOWN	CAGTGCAATAGTATTGTCAAAGC
mir-34c (Mus musculus)	Mus musculus	44.5262	766.293	0.058106	7.42298e-171	4.39737e-169	DOWN	AGGCAGTGTAGTTAGCTGATTGC
mir-34b (Mus musculus)	Mus musculus	3.50773	43.0143	0.081548	8.22207e-10	7.65842e-09	DOWN	AGGCAGTGTAATTAGCTGATTGT
mir-106b (Mus musculus)	Mus musculus	133.679	507.775	0.263265	2.35197e-52	6.45049e-51	DOWN	TAAAGTGCTGACAGTGCAGAT
mir-130b (Mus musculus)	Mus musculus	34.4687	207.588	0.166043	2.27327e-31	4.10575e-30	DOWN	CAGTGCAATGATGAAAGGGCAT
mir-192 (Mus musculus)	Mus musculus	106.446	250.573	0.42481	1.28636e-14	1.42172e-13	DOWN	CTGACCTATGAATTGACAGCC
mir-15a (Mus musculus)	Mus musculus	170.991	397.99	0.429637	5.34944e-22	7.47408e-21	DOWN	TAGCAGCACATAATGGTTTGTG
mir-18a (Mus musculus)	Mus musculus	13.027	112.039	0.116272	1.15919e-20	1.57501e-19	DOWN	TAAGGTGCATCTAGTGCAGATAG
mir-20a (Mus musculus)	Mus musculus	110.661	600.231	0.184365	1.77077e-82	5.82781e-81	DOWN	TAAAGTGCTTATAGTGCAGGTAG
mir-23a (Mus musculus)	Mus musculus	2779.94	1186.9	2.34218	3.18553e-145	1.4743e-143	UP	ATCACATTGCCAGGGAATTCC
mir-24-2 (Mus musculus)	Mus musculus	30.6406	14.3228	2.13929	0.0258944	0.118729	UP	TACCTACTGAGCTGAAACA
mir-31 (Mus musculus)	Mus musculus	491.842	9486.03	0.051849	0	0	DOWN	AGGCAAGATGCTGGCATAGCTG
mir-93 (Mus musculus)	Mus musculus	1395.43	3152.68	0.442617	8.3489e-154	4.41597e-152	DOWN	CAAAGTGCTGTTCGTGCAGGTAG
mir-148b (Mus musculus)	Mus musculus	460.032	977.498	0.470622	3.28086e-43	7.04196e-42	DOWN	TCAGTGCATCACAGAACTTTGT,GAAGTTCTGTTATACACTCAGGCT
mir-340 (Mus musculus)	Mus musculus	187.675	1147.47	0.163556	1.21875e-168	6.94221e-167	DOWN	TTATAAAGCAATGAGACTGATT
mir-107 (Mus musculus)	Mus musculus	173.867	370.467	0.469318	1.50626e-17	1.8285e-16	DOWN	AGCAGCATTGTACAGGGCTATCA
mir-17 (Mus musculus)	Mus musculus	113.855	659.508	0.172637	1.68806e-94	6.57901e-93	DOWN	CAAAGTGCTTACAGTGCAGGTAG
mir-25 (Mus musculus)	Mus musculus	1976.6	4471.09	0.442085	3.89356e-218	2.88318e-216	DOWN	CATTGCACTTGTCTCGGTCTGA
mir-139 (Mus musculus)	Mus musculus	47.2684	19.4411	2.43137	0.00091421	0.00528885	UP	TCTACAGTGCACGTGTCTCCAG
mir-218-2 (Mus musculus)	Mus musculus	52.6529	109.936	0.478944	6.93556e-06	5.26747e-05	DOWN	CATGGTTCTGTCAAGCACCGCG
mir-211 (Mus musculus)	Mus musculus	34.8472	158.738	0.219527	2.68998e-20	3.62169e-19	DOWN	TTCCCTTTGTCATCCTTTGCCT
mir-181b-1 (Mus musculus)	Mus musculus	307.815	664.17	0.463459	5.48807e-31	9.67599e-30	DOWN	AACATTCATTGCTGTCGGTGGGT
mir-335 (Mus musculus)	Mus musculus	8.49448	67.7529	0.125374	1.38005e-12	1.48105e-11	DOWN	TTTTTCATTATTGCTCCTGACC
mir-181b-2 (Mus musculus)	Mus musculus	334.436	744	0.449511	1.98673e-36	3.8715e-35	DOWN	AACATTCATTGCTGTCGGTGGGT
mir-450a-1 (Mus musculus)	Mus musculus	12.8972	37.5246	0.343699	0.000409473	0.00248537	DOWN	TTTTGCGATGTGTTCCTAATAT
mir-450a-2 (Mus musculus)	Mus musculus	12.8352	37.6057	0.341311	0.000409473	0.00248537	DOWN	TTTTGCGATGTGTTCCTAATAT
mir-1247 (Mus musculus)	Mus musculus	29.9341	132.188	0.226452	6.79788e-17	8.05413e-16	DOWN	ACCCGTCCCGTTCGTCCCCGGA
mir-421 (Mus musculus)	Mus musculus	14.4206	53.7377	0.268351	1.65186e-06	1.33684e-05	DOWN	ATCAACAGACATTAATTGGGCGC
mir-872 (Mus musculus)	Mus musculus	569.903	1424.02	0.400206	2.39724e-84	8.25654e-83	DOWN	AAGGTTACTTGTTAGTTCAGG
mir-3071 (Mus musculus)	Mus musculus	270.461	569.082	0.475259	2.03437e-25	3.10609e-24	DOWN	CATCATCGTCTCAAATGAGTCT
mir-3968 (Mus musculus)	Mus musculus	41.1242	84.069	0.489172	0.000125297	0.000813879	DOWN	TCGAATCCCACTCCTGACACCA
mir-5119 (Mus musculus)	Mus musculus	20.255	49.3257	0.410639	0.000534843	0.00318114	DOWN	ATCTCATCCTGGGGCT
mir-10b (Ovis aries)	Ovis aries	3944.94	1379.43	2.85984	1.24811e-282	1.15528e-280	UP	ACCCTGTAGAACCGAATTTGTG
mir-17 (Ovis aries)	Ovis aries	16.3857	50.2144	0.326316	2.92954e-05	0.000211641	DOWN	CAAAGTGCTTACAGTGCAGGTA
mir-23b (Ovis aries)	Ovis aries	1248.3	592.812	2.10573	9.32565e-54	2.70809e-52	UP	ATCACATTGCCAGGGATT
mir-145 (Pan troglodytes)	Pan troglodytes	130.31	42.2585	3.08363	1.54169e-11	1.55323e-10	UP	GTCCAGTTTTCCCAGGAATCCCTT
mir-188 (Pan troglodytes)	Pan troglodytes	33.9309	106.467	0.3187	3.56185e-10	3.35994e-09	DOWN	CATCCCTTGCATGGTGGAGGGT
mir-17 (Pan troglodytes)	Pan troglodytes	51.6571	403.777	0.127935	7.49577e-69	2.31276e-67	DOWN	CAAAGTGCTTACAGTGCAGGTAGT
mir-18a (Pan troglodytes)	Pan troglodytes	7.45817	34.3357	0.217213	2.54437e-05	0.000185626	DOWN	TAAGGTGCATCTAGTGCAGATA
mir-20a (Pan troglodytes)	Pan troglodytes	9.36194	35.8262	0.261316	9.84711e-05	0.000651052	DOWN	TAAAGTGCTTATAGTGCAGGTA
mir-183 (Pan troglodytes)	Pan troglodytes	104.657	255.627	0.409414	7.74616e-16	8.82467e-15	DOWN	TATGGCACTGGTAGAATTCACTG
mir-10b (Rattus norvegicus)	Rattus norvegicus	5019.59	1770.53	2.83508	0	0	UP	ACCCTGTAGAACCGAATTTGTGT
mir-214 (Rattus norvegicus)	Rattus norvegicus	196.164	95.0829	2.06308	3.63509e-09	3.30281e-08	UP	ACAGCAGGCACAGACAGGCAG
mir-203b (Rattus norvegicus)	Rattus norvegicus	9776.61	26076.7	0.374918	0	0	DOWN	GTGAAATGTTTAGGACCACT
mir-3570 (Rattus norvegicus)	Rattus norvegicus	132.67	305.548	0.434204	6.30537e-17	7.53085e-16	DOWN	ACCATCGACCGTTGATTGTACC
mir-3590 (Rattus norvegicus)	Rattus norvegicus	1442.73	3907.58	0.369213	4.24559e-259	3.49317e-257	DOWN	CAGTGCAATGTCAAAAGGGCA
mir-708 (Sus scrofa)	Sus scrofa	49.5827	199.45	0.248597	1.22603e-22	1.74592e-21	DOWN	CAACTAGACTGTGAGCTTCTAGA
mir-615 (Sus scrofa)	Sus scrofa	22.9485	51.3431	0.446963	0.000764408	0.00449241	DOWN	TCCGAGCCTGGGTCTCCCTCT
mir-3613 (Sus scrofa)	Sus scrofa	22.2392	47.3317	0.469857	0.00294226	0.0161388	DOWN	TGTTGTACTTTTTTTTTTGTT
